# Supplementary material for: Phylogeography by diffusion on a sphere: whole world phylogeography
Source: PubMed Central journal article supplement (PMC5018680; doi:10.7717/peerj.2406), 2016-09-06
Supplement: peerj-04-2406-s001.pdf [file peerj-04-2406-s001.pdf]

## Appendix A: Proof of Theorem

*Proof.* First, we show that Equation (9) and (8) are valid for any internal node  $x_i$  when calculated by post-order traversal. When we reach  $x_i$  it can be an internal node or the root node. If  $x_i$  is an internal node, we distinguish between the children being leaf nodes or internal nodes. Images for Figure 1 were taken from Wikipedia.

1)  $x_{L(i)}$  and  $x_{R(i)}$  are leaf nodes. Then Equation (4) gives, (using  $\phi_{L(i)} = m_{L(i)}$ ,  $\phi_{R(i)} = m_{R(i)}$  for child nodes  $x_{L(i)}$  and  $x_{R(i)}$ , and the definition of  $m_i$  and  $\rho_i$ )

$$\begin{aligned}\phi_i &= l_i\phi_{L(i)} + r_i\phi_{R(i)} + p_i\phi_{P(i)} \\ &= l_im_{L(i)} + r_im_{R(i)} + p_i\phi_{P(i)} \\ &= \frac{l_{L(i)}m_{L(i)} + r_{R(i)}m_{R(i)}}{1 - l_{L(i)}0 - r_{R(i)}0} + \frac{p_i}{1 - l_{L(i)}0 - r_{R(i)}0}\phi_{P(i)} \\ &= m_i + \rho_i\phi_{P(i)}.\end{aligned}$$

2)  $x_{L(i)}$  is a leaf and  $x_{R(i)}$  an internal node. Then,  $\phi_{R(i)} = m_{R(i)} + \rho_{R(i)}\phi_i$  (by post-order traversal) and  $\phi_{L(i)} = m_{L(i)}$ . Then Equation (4) gives,

$$\begin{aligned}\phi_i &= l_i\phi_{L(i)} + r_i\phi_{R(i)} + p_i\phi_{P(i)} \\ &= l_im_{L(i)} + r_i(m_{R(i)} + \rho_{R(i)}\phi_i) + p_i\phi_{P(i)}\end{aligned}$$

grouping  $\phi_i$  and divide by  $1 - 0 - r_i\rho_{R(i)}$  gives

$$\begin{aligned}lat_i &= \frac{l_{L(i)}m_{L(i)} + r_{R(i)}m_{R(i)}}{1 - l_{L(i)}0 - r_{R(i)}\rho_{R(i)}} + \frac{p_i}{1 - l_{L(i)}0 - r_{R(i)}\rho_{R(i)}}\phi_{P(i)} \\ &= \frac{l_{L(i)}m_{L(i)} + r_{R(i)}m_{R(i)}}{1 - l_{L(i)}\rho_{L(i)} - r_{R(i)}\rho_{R(i)}} + \frac{p_i}{1 - l_{L(i)}\rho_{L(i)} - r_{R(i)}\rho_{R(i)}}\phi_{P(i)} \\ &= m_i + \rho_i\phi_{P(i)}.\end{aligned}$$

3)  $x_{L(i)}$  is an internal node and  $x_{R(i)}$  a leaf node. By symmetry, case 2 holds.

4)  $x_{L(i)}$  and  $x_{R(i)}$  are both internal nodes. Then,  $\phi_{L(i)} = m_{L(i)} + \rho_{L(i)}\phi_i$  and  $\phi_{R(i)} = m_{R(i)} + \rho_{R(i)}\phi_i$  (by post-order traversal). Now Equation (4) gives,

$$\begin{aligned}\phi_i &= l_i\phi_{L(i)} + r_i\phi_{R(i)} + p_i\phi_{P(i)} \\ &= l_i(m_{L(i)} + \rho_{L(i)}\phi_i) + r_i(m_{R(i)} + \rho_{R(i)}\phi_i) + p_i\phi_{P(i)}\end{aligned}$$

grouping  $\phi_i$  and divide by  $1 - l_i\rho_{L(i)} - r_i\rho_{R(i)}$  gives

$$\begin{aligned}lat_i &= \frac{l_{L(i)}m_{L(i)} + r_{R(i)}m_{R(i)}}{1 - l_{L(i)}\rho_{L(i)} - r_{R(i)}\rho_{R(i)}} + \frac{p_i}{1 - l_{L(i)}\rho_{L(i)} - r_{R(i)}\rho_{R(i)}}\phi_{P(i)} \\ &= m_i + \rho_i\phi_{P(i)}.\end{aligned}$$

If  $x_i$  is the root Equation (8) follows from a similar argument, but with  $\rho_i = 0$ .

From equations Equations (9) and (8) together it follows that the mean can be calculated by post-order traversal to provide information for the root location (8) to be calculated, followed by a pre-order traversal to calculate locations of internal nodes using (9).

Complexity: it is easy to see the algorithm is  $O(n)$  since it takes one post-order traversal sending  $2n - 2$  messages up and one pre-order traversal calculating locations for  $n - 1$  internal nodes. Each message and latitude calculation is  $O(1)$ .  $\square$

## Appendix B: HBV data

| Genbank  | year | location  | Genbank  | year | location    | Genbank  | year | location    |
|----------|------|-----------|----------|------|-------------|----------|------|-------------|
| AB026814 | 1998 | Japan     | AB198076 | 2001 | China       | AJ748098 | 2002 | Vietnam     |
| AB033550 | 1988 | Japan     | AB198077 | 2001 | China       | AY341335 | 2003 | Greece      |
| AB033554 | 1985 | Indonesia | AB198078 | 2001 | China       | AY641558 | 2003 | Korea       |
| AB033555 | 1984 | Indonesia | AB198079 | 2001 | China       | AY641559 | 2003 | Korea       |
| AB033556 | 1985 | Japan     | AB198080 | 2001 | China       | AY641560 | 2003 | Korea       |
| AB049609 | 1996 | Japan     | AB198081 | 2001 | China       | AY641561 | 2003 | Korea       |
| AB049610 | 1996 | Japan     | AB198082 | 2001 | China       | AY641562 | 2003 | Korea       |
| AB106564 | 1999 | Ghana     | AB198083 | 2001 | China       | AY641563 | 2003 | Korea       |
| AB109475 | 2001 | Japan     | AB198084 | 2001 | China       | AY721605 | 2004 | Turkey      |
| AB109476 | 1997 | Japan     | AB205010 | 1994 | Japan       | AY721606 | 2004 | Turkey      |
| AB109477 | 1997 | Japan     | AB205118 | 2001 | Japan       | AY721607 | 2004 | Turkey      |
| AB109478 | 1998 | Japan     | AB205119 | 2000 | Japan       | AY721608 | 2004 | Turkey      |
| AB109479 | 1997 | Japan     | AB205120 | 2000 | Japan       | AY721609 | 2004 | Turkey      |
| AB110075 | 2001 | Japan     | AB205122 | 2001 | Vietnam     | AY721611 | 2004 | Turkey      |
| AB111121 | 1998 | Japan     | AB205123 | 2002 | China       | AY721612 | 2004 | Turkey      |
| AB111125 | 2001 | Japan     | AB205124 | 2003 | Japan       | AY738143 | 1997 | Germany     |
| AB111946 | 1998 | Vietnam   | AB205125 | 2001 | Vietnam     | AY738147 | 1998 | DR Congo    |
| AB112063 | 1998 | Vietnam   | AB205126 | 2001 | Japan       | AY796030 | 2004 | Turkey      |
| AB112065 | 1998 | Vietnam   | AB205127 | 2000 | Russia      | AY796031 | 2004 | Turkey      |
| AB112066 | 1999 | Myanmar   | AB205128 | 2000 | Russia      | D23680   | 1991 | Japan       |
| AB112348 | 1999 | Myanmar   | AB205129 | 1999 | Ghana       | D23681   | 1992 | Japan       |
| AB112408 | 1999 | Myanmar   | AB205188 | 2000 | Ghana       | D23682   | 1984 | Japan       |
| AB112471 | 2002 | Thailand  | AB205189 | 2000 | Ghana       | D23683   | 1984 | Japan       |
| AB112472 | 2002 | Thailand  | AB205190 | 2000 | Ghana       | D23684   | 1988 | Japan       |
| AB115417 | 1996 | Japan     | AB205191 | 2000 | Ghana       | D28880   | 1992 | Japan       |
| AB115551 | 2004 | Cambodia  | AB205192 | 2000 | Ghana       | DQ060824 | 1983 | Namibia     |
| AB116266 | 1987 | Japan     | AB212625 | 2004 | Vietnam     | DQ060825 | 1983 | Namibia     |
| AB117758 | 2004 | Cambodia  | AB212626 | 2004 | Vietnam     | DQ060826 | 1983 | Namibia     |
| AB117759 | 2004 | Cambodia  | AB219426 | 2002 | Philippines | DQ060827 | 1983 | Namibia     |
| AB119251 | 2002 | Japan     | AB219427 | 2002 | Philippines | DQ060828 | 1983 | Namibia     |
| AB119252 | 2002 | Japan     | AB219428 | 2002 | Philippine  | DQ060829 | 1983 | Namibia     |
| AB119253 | 2000 | Japan     | AB219429 | 2002 | Philippines | DQ315776 | 2000 | India       |
| AB119254 | 2003 | Japan     | AF121243 | 1995 | Vietnam     | DQ315777 | 2003 | India       |
| AB119255 | 2001 | Japan     | AF121244 | 1993 | Vietnam     | DQ315778 | 2003 | India       |
| AB119256 | 1997 | Japan     | AF121245 | 1992 | Vietnam     | DQ315779 | 2003 | India       |
| AB120308 | 1982 | Japan     | AF121246 | 1998 | Vietnam     | DQ315780 | 2002 | India       |
| AB126580 | 2000 | Russia    | AF121247 | 1994 | Vietnam     | DQ315781 | 2003 | India       |
| AB126581 | 2000 | Russia    | AF121248 | 1994 | Vietnam     | DQ315782 | 2004 | India       |
| AB179747 | 2002 | Italy     | AF121249 | 1998 | Vietnam     | DQ315783 | 2003 | India       |
| AB188241 | 1999 | Japan     | AF121250 | 1997 | Vietnam     | DQ315784 | 2003 | India       |
| AB188242 | 1999 | Japan     | AF121251 | 1997 | Vietnam     | DQ315785 | 2003 | India       |
| AB188243 | 1999 | Japan     | AF182802 | 1992 | China       | DQ315786 | 2005 | India       |
| AB188245 | 2000 | Japan     | AJ344117 | 1990 | France      | M57663   | 1987 | Philippines |
